# Supplementary material for: Characteristics and Rates of Preterm Births During the COVID-19 Pandemic in Germany
Source: PubMed Central journal article supplement (PMC11388025; doi:10.1001/jamanetworkopen.2024.32438), 2024-09-10
Supplement: jamanetwopen-e2432438-s001.pdf [file jamanetwopen-e2432438-s001.pdf]

## Supplemental Online Content

Staudé B, Misselwitz B, Louwen F, et al. Characteristics and rates of preterm births during the COVID-19 pandemic in Germany. *JAMA Netw Open*. 2024;7(9):e2432438. doi:10.1001/jamanetworkopen.2024.32438

**eFigure 1.** Diagram of the Pandemic Phases and Corresponding Prepandemic Time Periods

**eFigure 2.** Flowchart of the Total Sample and Patient Subpopulations Included in the Study

**eFigure 3.** Livebirths, Preterm Births <32 Weeks' Gestation, and Stillbirths by Year (2017-2020)

**eFigure 4.** Indicated and Nonindicated Preterm Births (<32 Weeks) Before and During the COVID-19 Pandemic

**eTable 1.** Time Effect With and Without the Year 2020 (COVID-19 Lockdown)

**eTable 2.** Odds Ratios for Prematurity (<37 Weeks) in Different Phases of the Year

**eTable 3.** Pregnancy and Birth Risks in 2017-2019 and 2020 in Very Preterm (<32 Weeks) Infants

**eTable 4.** Pregnancy and Birth Risks in 2017-2019 and 2020 in Preterm (<37 Weeks) Infants

**eTable 5.** Pregnancy and Birth Risks in 2017-2019 and 2020 in Late Preterm (32 to 36 Weeks) Infants

**eTable 6.** Logistic Regression Models for Very Preterm Births <32 Weeks vs Term-Born Infants With Covariates

This supplemental material has been provided by the authors to give readers additional information about their work.

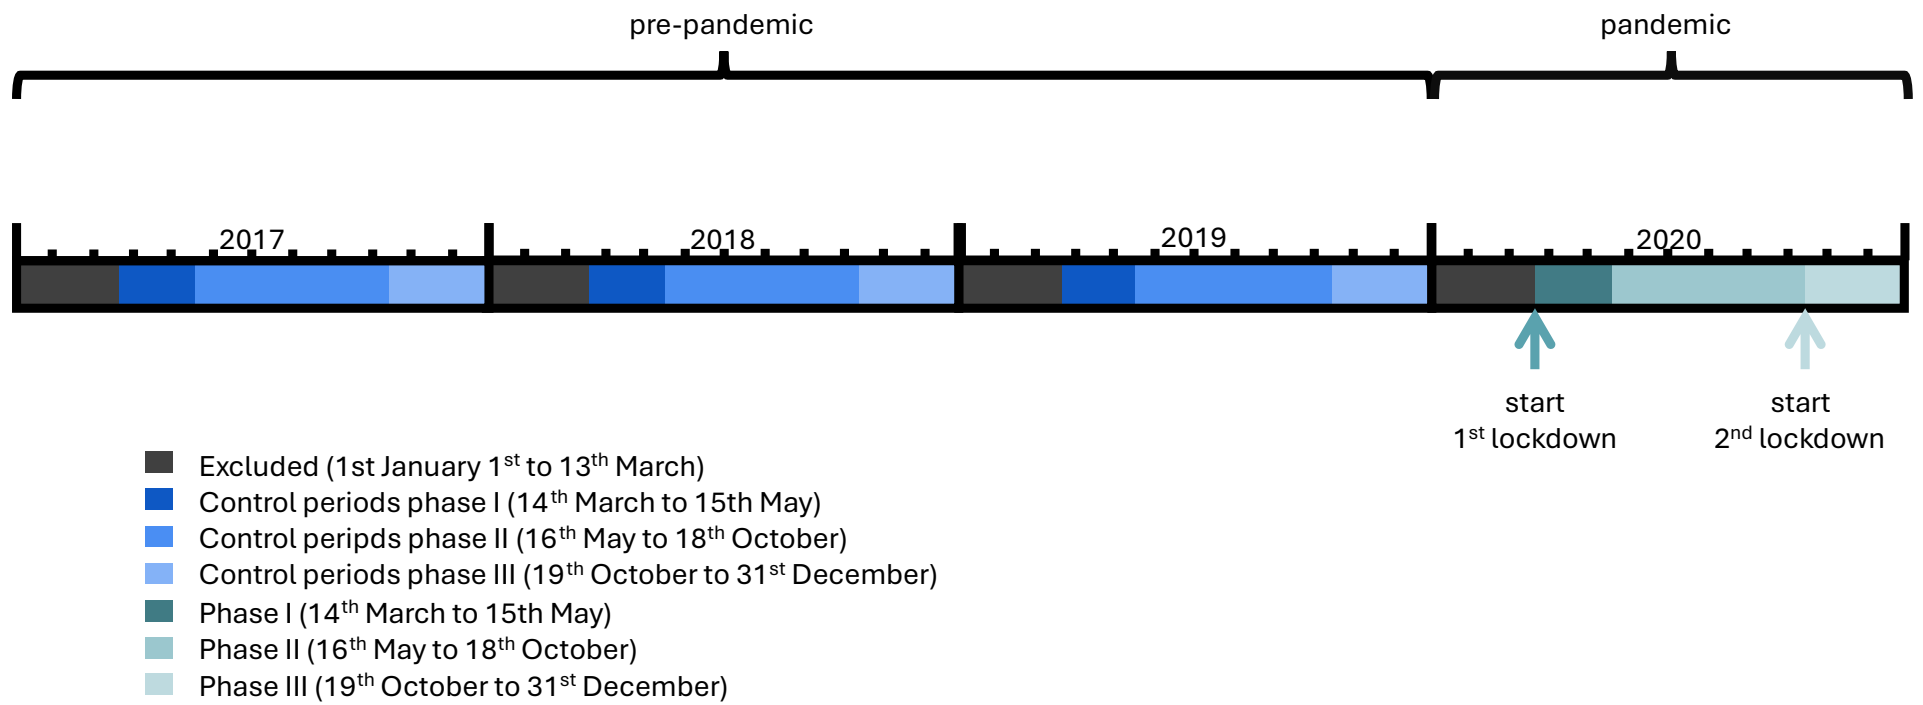

eFigure1

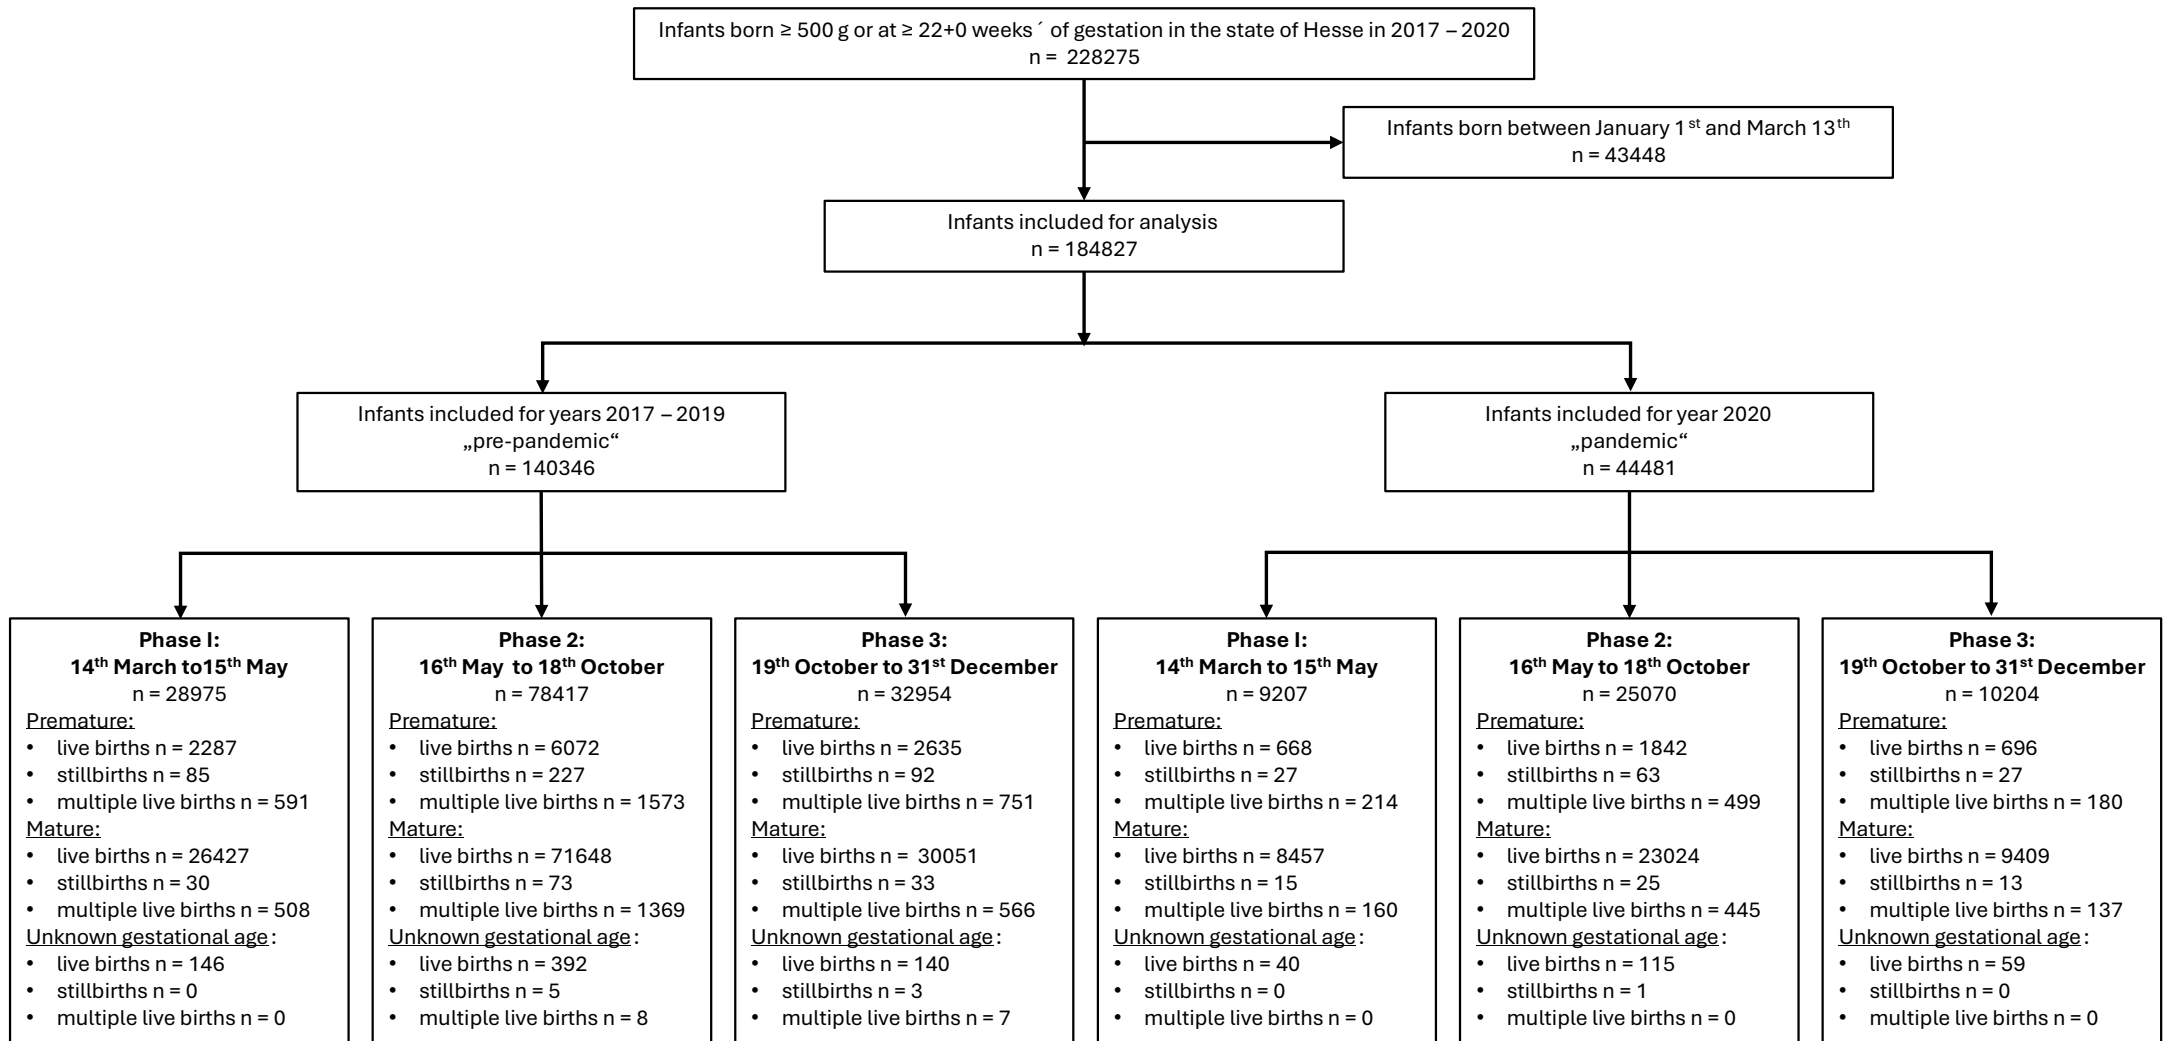

eFigure2

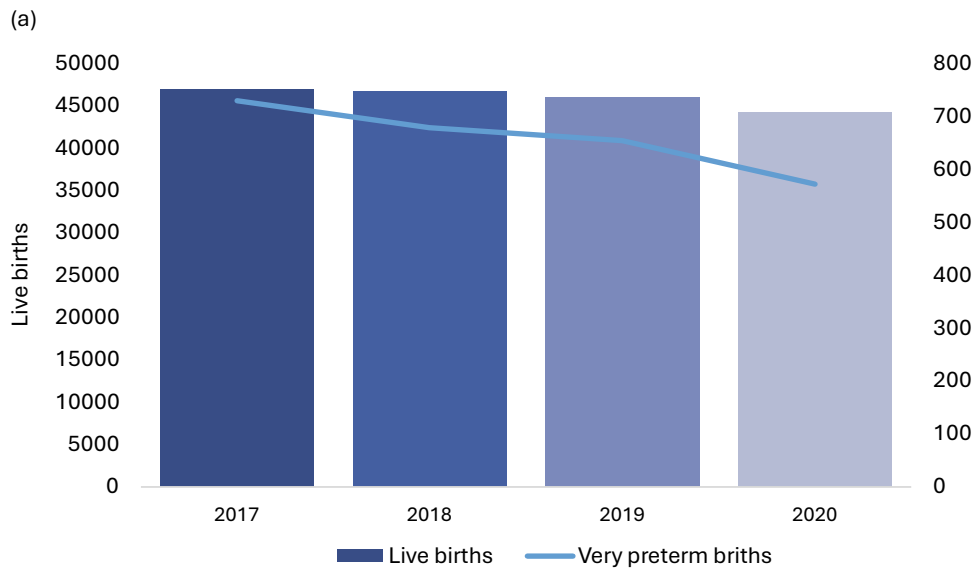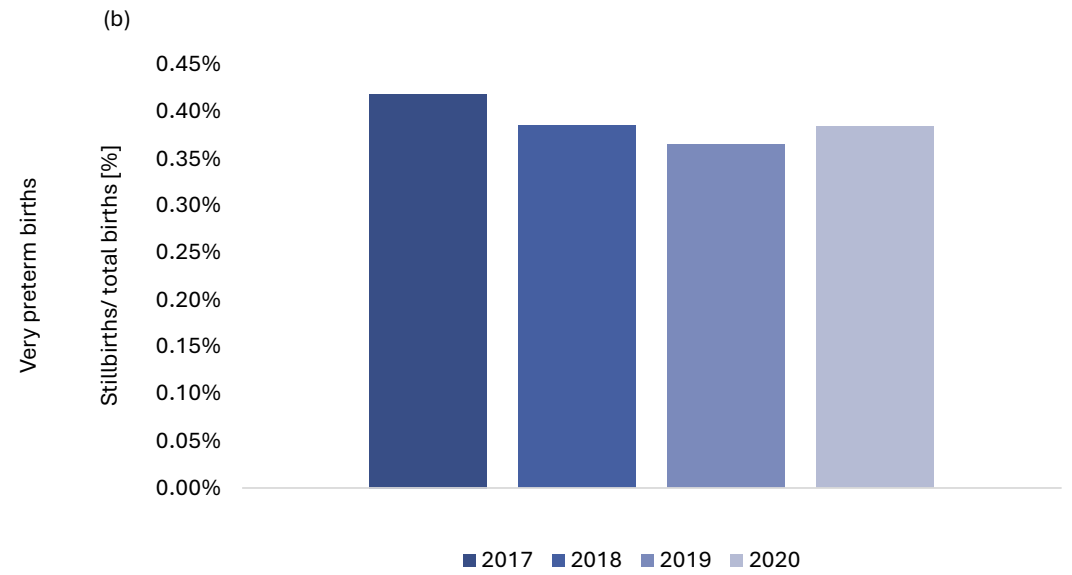

eFigure 3

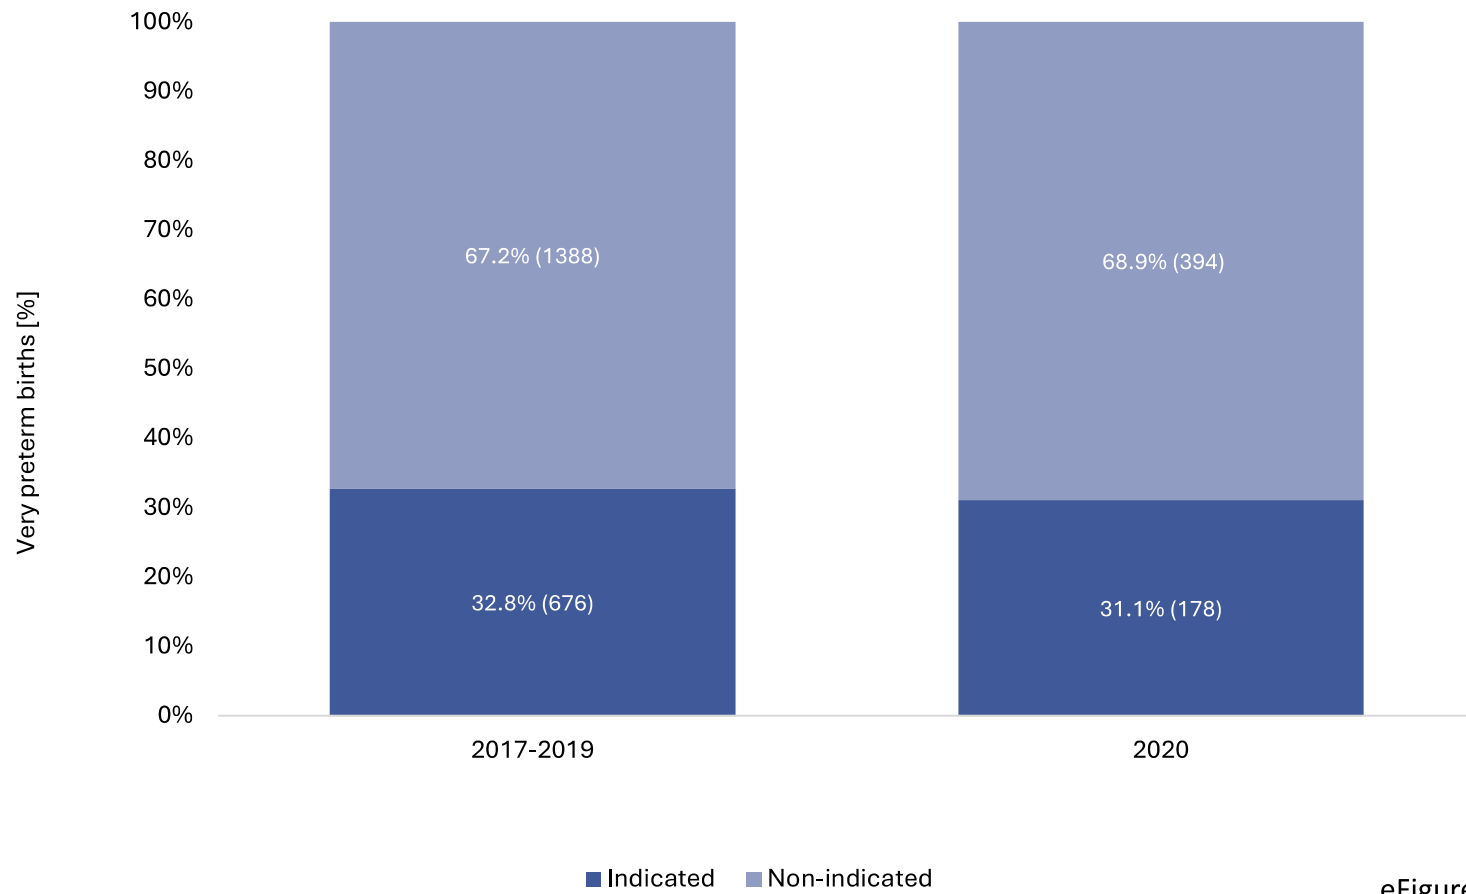

eFigure 4

eFigure 4

### **eFigure Legends**

**eFigure 1. Diagram of the pandemic phases and corresponding pre-pandemic time periods.** Depicted are the different phases of the first (phase I; 14/03/2020 to 15/05/2020) and second (phase III; 19/10/2020 to 31/12/2020) lockdown and the less vigorous restrictions in between (phase II; 16/05/2020 to 18/10/2020) and the corresponding pre-pandemic periods separated by years.

**eFigure 2. Flow chart of the total sample and patient subpopulations included into the analyses of the study.** Presentation of case numbers included into the analyses separated into the pre-pandemic (2017-2020) and pandemic (2020) period. Numbers are segregated for term and preterm livebirths, stillbirths and multiple live births and for cases with unknown gestational age.

**eFigure 3. Livebirths, preterm births <32 weeks' gestation and stillbirths by year (2017-2020).** In (a), numbers of total live births and preterm deliveries <32 weeks are given by year. In (b), the yearly frequency of stillbirths is presented.

**eFigure 4. Indicated and non-indicated preterm births <32 weeks before and during the COVID-19 pandemic.** Proportions of infants with non-indicated deliveries with spontaneous onset by preterm labor, premature rupture of membranes (PROM) or amniotic infection and indicated births comprising all other causes of preterm delivery are given for the pre-pandemic (2017-2019) situation and the COVID-19 pandemic (2020) are given.

## Supplemental Tables

**eTable 1: Time effect with and without the year 2020 (COVID-19 lockdown)**

| <i>Predictors</i> | Pre-pandemic       |             |                  | Pandemic               |                  |
|-------------------|--------------------|-------------|------------------|------------------------|------------------|
|                   | <i>Odds Ratios</i> | <i>(CI)</i> | <i>p</i>         | <i>Odds Ratios(CI)</i> | <i>p</i>         |
| (Intercept)       | 0.02 (0.02 – 0.02) |             | <b>&lt;0.001</b> | 0.02 (0.02 – 0.02)     | <b>&lt;0.001</b> |
| Year of birth     | 0.96 (0.91 – 1.01) |             | 0.100            | 0.94 (0.91 – 0.98)     | <b>0.001</b>     |
| Observations      | 130326             |             |                  | 171841                 |                  |
| AIC               | 21208.6            |             |                  | 27246.8                |                  |

Logistic regression models were calculated for the occurrence of very preterm deliveries vs term deliveries in the years before the COVID lockdown (2017-2019) and including the year 2020. CI, confidence interval; AIC, Akaike Information Criterion.

**eTable 2. Odds ratios for prematurity (< 37 weeks) in different phases of the year**

| Phase | 2020    |       | 2017 - 2019 |        | OR    | odds ratio |          | Fisher exact test |
|-------|---------|-------|-------------|--------|-------|------------|----------|-------------------|
|       | preterm | term  | preterm     | term   |       | lower CI   | upper CI | p-value           |
| all   | 3323    | 40943 | 11398       | 128262 | 0.913 | 0.877      | 0.951    | < 0.001           |
| I     | 695     | 8472  | 2372        | 26457  | 0.915 | 0.837      | 1        | 0.05              |
| II    | 1905    | 23049 | 6299        | 71721  | 0.941 | 0.892      | 0.993    | 0.03              |
| III   | 723     | 9422  | 2727        | 30084  | 0.847 | 0.776      | 0.922    | < 0.001           |

OR: odds ratio, CI: confidence interval; p-value from Fisher's Exact test



**eTable 3. Pregnancy and birth risks in 2017-2019 and 2020 in very preterm infants (< 32 weeks)**

|                                            | 2020         |      | 2017 - 2019  |       | OR   | odds ratio |          | Fisher exact test |          |
|--------------------------------------------|--------------|------|--------------|-------|------|------------|----------|-------------------|----------|
|                                            | very preterm | term | very preterm | term  |      | lower CI   | upper CI | p-value           | p-adjust |
| Multiple pregnancy                         | 153          | 723  | 623          | 2449  | 0.83 | 0.68       | 1.01     | 0.07              | 1        |
| Maternal age                               |              |      |              |       |      |            |          |                   |          |
| < 18 years                                 | 0            | 132  | 12           | 517   | 0    | 0          | 1.43     | 0.14              | 1        |
| > 35 years                                 | 145          | 8265 | 549          | 24849 | 0.80 | 0.66       | 0.96     | 0.02              | 0.44     |
| Previous severe maternal disease           | 76           | 5825 | 362          | 17874 | 0.64 | 0.50       | 0.83     | <0.001            | 0.01     |
| Previous caesarian section/uterine surgery | 109          | 7866 | 375          | 23802 | 0.88 | 0.70       | 1.09     | 0.27              | 1        |
| Previous preterm delivery                  | 26           | 780  | 90           | 2298  | 0.85 | 0.52       | 1.34     | 0.52              | 1        |
| Family history of severe disease           | 94           | 8831 | 418          | 28572 | 0.73 | 0.58       | 0.91     | 0.005             | 0.17     |
| Gestational diabetes                       | 28           | 2767 | 98           | 7884  | 0.81 | 0.51       | 1.25     | 0.36              | 1        |
| Obesity                                    | 110          | 4920 | 279          | 11402 | 0.91 | 0.72       | 1.15     | 0.47              | 1        |
| Particular psychological burden            | 20           | 1151 | 86           | 4145  | 0.84 | 0.49       | 1.38     | 0.55              | 1        |
| Preexisting hypertension                   | 21           | 341  | 101          | 995   | 0.61 | 0.35       | 1.00     | 0.05              | 1        |
| Preeclampsia/eclampsia/HELLP               | 73           | 587  | 239          | 2014  | 1.05 | 0.78       | 1.39     | 0.72              | 1        |
| Bleeding < 28 weeks                        | 35           | 286  | 88           | 893   | 1.24 | 0.80       | 1.90     | 0.32              | 1        |
| Bleeding ≥ 28 weeks                        | 8            | 46   | 15           | 148   | 1.71 | 0.59       | 4.63     | 0.31              | 1        |
| Placenta praevia                           | 26           | 126  | 76           | 393   | 1.07 | 0.63       | 1.77     | 0.80              | 1        |
| Placental abruption                        | 44           | 117  | 149          | 315   | 0.80 | 0.52       | 1.20     | 0.28              | 1        |
| Placental insufficiency                    | 49           | 811  | 197          | 2778  | 0.85 | 0.60       | 1.18     | 0.39              | 1        |
| Preterm labor/PROM/amniotic infection      | 394          | 6542 | 1388         | 18773 | 0.82 | 0.72       | 0.92     | <0.001            | 0.01     |
| PROM                                       | 144          | 6139 | 609          | 17336 | 0.67 | 0.55       | 0.80     | <0.001            | <0.001   |
| Pathologic CTG                             | 104          | 6922 | 441          | 19381 | 0.66 | 0.53       | 0.82     | <0.001            | 0.003    |

OR: odds ratio, CI: confidence interval; p-value from Fisher's Exact test, p-value adjustment: Holm.  
PROM: premature rupture of membranes. CTG: cardiotocography.

**eTable 4. Pregnancy and birth risks in 2017-2019 and 2020 in preterm infants (< 37 weeks)**

|                                            | 2020    |      | 2017 - 2019 |       | OR   | odds ratio |          | Fisher exact test |          |
|--------------------------------------------|---------|------|-------------|-------|------|------------|----------|-------------------|----------|
|                                            | preterm | term | preterm     | term  |      | lower CI   | upper CI | p-value           | p-adjust |
| Multiple pregnancy                         | 884     | 723  | 2930        | 2449  | 1.02 | 0.91       | 1.15     | 0.71              | 1        |
| Maternal age                               |         |      |             |       |      |            |          |                   |          |
| < 18 years                                 | 7       | 132  | 51          | 517   | 0.54 | 0.20       | 1.23     | 0.17              | 1        |
| > 35 years                                 | 797     | 8265 | 2861        | 24849 | 0.84 | 0.77       | 0.91     | <0.001            | 0.001    |
| Previous severe maternal disease           | 575     | 5825 | 2063        | 17874 | 0.86 | 0.78       | 0.94     | 0.001             | 0.04     |
| Previous caesarian section/uterine surgery | 685     | 7866 | 2385        | 23802 | 0.87 | 0.79       | 0.95     | 0.002             | 0.05     |
| Previous preterm delivery                  | 179     | 780  | 538         | 2298  | 0.98 | 0.81       | 1.19     | 0.85              | 1        |
| Family history of severe disease           | 724     | 8831 | 2652        | 28572 | 0.88 | 0.81       | 0.96     | 0.004             | 0.12     |
| Gestational diabetes                       | 249     | 2767 | 888         | 7884  | 0.80 | 0.69       | 0.93     | 0.003             | 0.07     |
| Obesity                                    | 512     | 4920 | 1295        | 11402 | 0.92 | 0.82       | 1.02     | 0.12              | 1        |
| Particular psychological burden            | 97      | 1151 | 471         | 4145  | 0.74 | 0.58       | 0.93     | 0.01              | 0.22     |
| Preexisting hypertension                   | 87      | 341  | 366         | 995   | 0.69 | 0.53       | 0.91     | 0.006             | 0.16     |
| Preeclampsia/eclampsia/HELLP               | 295     | 587  | 1070        | 2014  | 0.95 | 0.80       | 1.11     | 0.52              | 1        |
| Bleeding < 28 weeks                        | 77      | 286  | 215         | 893   | 1.12 | 0.82       | 1.51     | 0.45              | 1        |
| Bleeding ≥ 28 weeks                        | 32      | 46   | 94          | 148   | 1.10 | 0.63       | 1.90     | 0.79              | 1        |
| Placenta praevia                           | 104     | 126  | 393         | 393   | 0.83 | 0.61       | 1.12     | 0.20              | 1        |
| Placental abruption                        | 131     | 117  | 353         | 315   | 1.00 | 0.74       | 1.35     | 1                 | 1        |
| Placental insufficiency                    | 209     | 811  | 728         | 2778  | 0.98 | 0.82       | 1.17     | 0.86              | 1        |
| Preterm labor/PROM/amniotic infection      | 2059    | 6542 | 6675        | 18773 | 0.89 | 0.84       | 0.94     | <0.001            | 0.001    |
| PROM                                       | 1173    | 6139 | 3792        | 17336 | 0.87 | 0.81       | 0.94     | <0.001            | 0.007    |
| Pathologic CTG                             | 525     | 6922 | 1693        | 19381 | 0.87 | 0.78       | 0.96     | 0.007             | 0.16     |

OR: odds ratio, CI: confidence interval; p-value from Fisher's Exact test, p-value adjustment: Holm.  
PROM: premature rupture of membranes. CTG: cardiotocography.

**eTable 5. Pregnancy and birth risks in 2017-2019 and 2020 in late preterm infants (32 to 36 weeks)**

|                                            | 2020         |      | 2017 - 2019  |       | OR   | odds ratio |          | Fisher exact test |          |
|--------------------------------------------|--------------|------|--------------|-------|------|------------|----------|-------------------|----------|
|                                            | late preterm | term | late preterm | term  |      | lower CI   | upper CI | p-value           | p-adjust |
| Multiple pregnancy                         | 731          | 723  | 2307         | 2449  | 1.07 | 0.95       | 1.21     | 0.24              | 1        |
| Maternal age                               |              |      |              |       |      |            |          |                   |          |
| < 18 years                                 | 7            | 132  | 39           | 517   | 0.70 | 0.26       | 1.64     | 0.57              | 1        |
| > 35 years                                 | 652          | 8265 | 2312         | 24849 | 0.85 | 0.77       | 0.93     | <0.001            | 0.01     |
| Previous severe maternal disease           | 499          | 5825 | 1701         | 17874 | 0.9  | 0.81       | 1        | 0.05              | 1        |
| Previous caesarian section/uterine surgery | 576          | 7866 | 2010         | 23802 | 0.87 | 0.79       | 0.96     | 0.004             | 0.11     |
| Previous preterm delivery                  | 153          | 780  | 448          | 2298  | 1.01 | 0.82       | 1.23     | 0.96              | 1        |
| Family history of severe disease           | 630          | 8831 | 2234         | 28572 | 0.91 | 0.83       | 1        | 0.05              | 1        |
| Gestational diabetes                       | 221          | 2767 | 790          | 7884  | 0.80 | 0.68       | 0.93     | 0.004             | 0.12     |
| Obesity                                    | 402          | 4920 | 1016         | 11402 | 0.92 | 0.81       | 1.04     | 0.17              | 1        |
| Particular psychological burden            | 77           | 1151 | 385          | 4145  | 0.72 | 0.55       | 0.93     | 0.01              | 0.31     |
| Preexisting hypertension                   | 66           | 341  | 265          | 995   | 0.73 | 0.53       | 0.98     | 0.04              | 1        |
| Preeclampsia/eclampsia/HELLP               | 222          | 587  | 831          | 2014  | 0.92 | 0.77       | 1.09     | 0.33              | 1        |
| Bleeding < 28 weeks                        | 42           | 286  | 127          | 893   | 1.03 | 0.69       | 1.52     | 0.85              | 1        |
| Bleeding ≥ 28 weeks                        | 24           | 46   | 79           | 148   | 0.98 | 0.53       | 1.77     | 1                 | 1        |
| Placenta praevia                           | 78           | 126  | 317          | 393   | 0.77 | 0.55       | 1.07     | 0.11              | 1        |
| Placental abruption                        | 87           | 117  | 204          | 315   | 1.15 | 0.81       | 1.62     | 0.45              | 1        |
| Placental insufficiency                    | 160          | 811  | 531          | 2778  | 1.03 | 0.85       | 1.26     | 0.77              | 1        |
| Preterm labor/PROM/amniotic infection      | 1665         | 6542 | 5287         | 18773 | 0.90 | 0.85       | 0.96     | 0.001             | 0.04     |
| PROM                                       | 1029         | 6139 | 3183         | 17336 | 0.91 | 0.85       | 0.99     | 0.02              | 0.53     |
| Pathologic CTG                             | 421          | 6922 | 1252         | 19381 | 0.94 | 0.84       | 1.06     | 0.32              | 1        |

OR: odds ratio, CI: confidence interval; p-value from Fisher's Exact test, p-value adjustment: Holm.

PROM: premature rupture of membranes. CTG: cardiotocography.

**eTable 6: Logistic regression models for very preterm births <32 weeks vs term born infants with covariates**

| <i>Predictors</i>             | <b>Model 0</b>     |                  | <b>Model Age</b>   |                  | <b>Model CTG</b>   |                  | <b>Model Indicated</b> |                  |
|-------------------------------|--------------------|------------------|--------------------|------------------|--------------------|------------------|------------------------|------------------|
|                               | <i>Odds Ratios</i> | <i>p</i>         | <i>Odds Ratios</i> | <i>p</i>         | <i>Odds Ratios</i> | <i>p</i>         | <i>Odds Ratios</i>     | <i>p</i>         |
| (Intercept)                   | 0.02               | <b>&lt;0.001</b> | 0.01               | <b>&lt;0.001</b> | 0.01               | <b>&lt;0.001</b> | 0.01                   | <b>&lt;0.001</b> |
| 2017-19                       | <i>Reference</i>   |                  | <i>Reference</i>   |                  | <i>Reference</i>   |                  | <i>Reference</i>       |                  |
| 2020                          | 0.87               | <b>0.003</b>     | 0.89               | <b>0.038</b>     | 0.87               | <b>0.003</b>     | 0.84                   | <b>0.036</b>     |
| maternal age > 35 years       |                    |                  | 1.51               | <b>&lt;0.001</b> |                    |                  |                        |                  |
| 2020: maternal age > 35 years |                    |                  | 0.89               | 0.287            |                    |                  |                        |                  |
| pathologic CTG                |                    |                  |                    |                  | 2.03               | <b>0.007</b>     |                        |                  |
| 2020: pathologic CTG          |                    |                  |                    |                  | 1.24               | 0.705            |                        |                  |
| non-indicated births          |                    |                  |                    |                  |                    |                  | 11.98                  | <b>&lt;0.001</b> |
| 2020: non-indicated births    |                    |                  |                    |                  |                    |                  | 0.97                   | 0.783            |
| Observations                  | 1718941            |                  | 1718941            |                  | 1718941            |                  | 1718941                |                  |
| R <sup>2</sup> Tjur           | 0.000              |                  | 0.000              |                  | 0.000              |                  | 0.032                  |                  |
| AIC                           | 27249              |                  | 27182              |                  | 27245              |                  | 23605                  |                  |

Logistic regression models were estimated using, all very preterm births (GA < 32 weeks) vs. term born infants. Covariates were maternal age >35 years (Model Age), pathologic CTG (Model CTG) and indicated vs. non-indicated births (Model Indicated). Non-indicated birth is defined as deliveries with spontaneous onset by preterm labor, premature rupture of membranes (PROM) or amniotic infection. AIC, Akaike Information Criterion.
